# Supplementary material for: Construction of immune-related signature and identification of S100A14 determining immune-suppressive microenvironment in pancreatic cancer
Source: PubMed Central journal article supplement (PMC9367131; doi:10.1186/s12885-022-09927-0), 2022-08-11

Replicate 1

S100A14

$\beta$ -actin

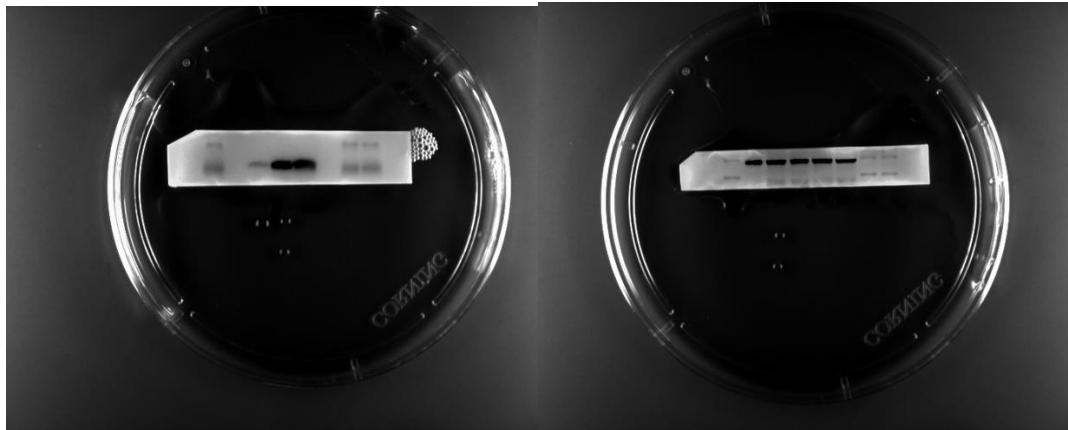

Replicate 2

S100A14

$\beta$ -actin

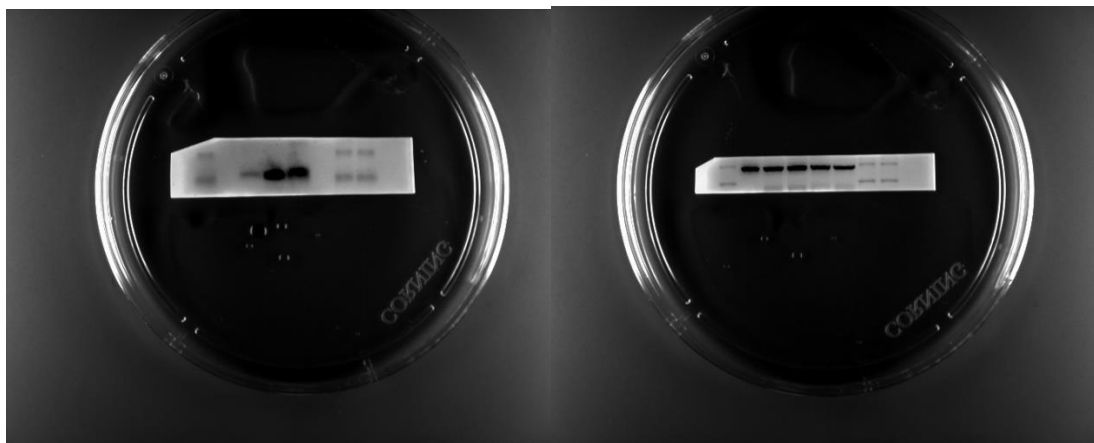

Replicate 3

S100A14

$\beta$ -actin

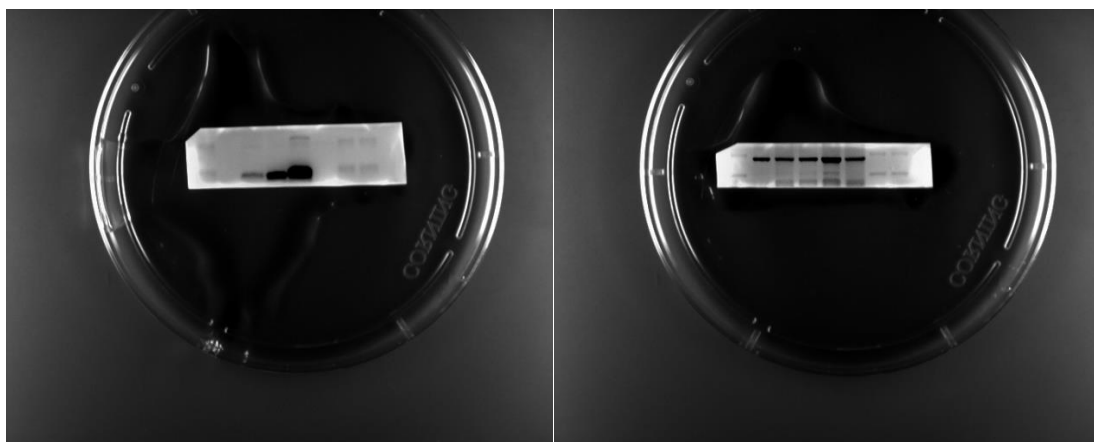

Supplement: 12885_2022_9927_MOESM2_ESM.pdf [file 12885_2022_9927_MOESM2_ESM.pdf]
