# Supplementary material for: Construction of immune-related signature and identification of S100A14 determining immune-suppressive microenvironment in pancreatic cancer
Source: PubMed Central journal article supplement (PMC9367131; doi:10.1186/s12885-022-09927-0), 2022-08-11
Supplement: 12885_2022_9927_MOESM3_ESM.pdf [file 12885_2022_9927_MOESM3_ESM.pdf]

Table S1. Detailed clinical and pathologic information of TCGA entire set.

| status       | life_span | gender | age | AJCC_stage | Grade | T | N  | M  |    |
|--------------|-----------|--------|-----|------------|-------|---|----|----|----|
| TCGA-2J-AAB1 | 1         | 66     | 1   | 65         | 2     | 3 | T3 | N1 | M0 |
| TCGA-2J-AAB4 | 0         | 729    | 1   | 48         | 2     | 2 | T2 | N1 | M0 |
| TCGA-2J-AAB6 | 1         | 293    | 1   | 75         | 2     | 2 | T3 | N0 | M0 |
| TCGA-2J-AAB8 | 0         | 80     | 1   | 71         | 2     | 3 | T3 | N1 | M0 |
| TCGA-2J-AAB9 | 1         | 627    | 2   | 70         | 2     | 1 | T3 | N1 | M0 |
| TCGA-2J-AABA | 1         | 607    | 1   | 55         | 2     | 2 | T3 | N1 | M0 |
| TCGA-2J-AABE | 0         | 676    | 1   | 73         | 2     | 2 | T3 | N0 | M0 |
| TCGA-2J-AABF | 1         | 691    | 1   | 73         | 2     | 3 | T3 | N1 | M0 |
| TCGA-2J-AABH | 0         | 1287   | 1   | 61         | 2     | 3 | T3 | N0 | M0 |
| TCGA-2J-AABI | 0         | 969    | 2   | 55         | 2     | 3 | T3 | N0 | M0 |
| TCGA-2J-AABK | 0         | 484    | 1   | 71         | 2     | 2 | T3 | N1 | M0 |
| TCGA-2J-AABO | 0         | 440    | 1   | 43         | 2     | 2 | T3 | N1 | M0 |
| TCGA-2J-AABP | 0         | 463    | 2   | 58         | 2     | 4 | T3 | N1 | M0 |
| TCGA-2J-AABR | 0         | 438    | 2   | 60         | 2     | 3 | T3 | N0 | M0 |
| TCGA-2J-AABT | 0         | 319    | 2   | 72         | 2     | 2 | T3 | N1 | M0 |
| TCGA-2J-AABU | 1         | 277    | 1   | 56         | 2     | 3 | T3 | N1 | M0 |
| TCGA-2J-AABV | 1         | 652    | 1   | 74         | 2     | 4 | T3 | N1 | M0 |
| TCGA-2L-AAQA | 1         | 143    | 1   | 76         | 2     | 2 | T3 | N1 | MX |
| TCGA-2L-AAQE | 1         | 684    | 1   | 56         | 2     | 2 | T3 | N1 | M0 |
| TCGA-2L-AAQI | 1         | 103    | 1   | 66         | 2     | 3 | T3 | N1 | MX |
| TCGA-2L-AAQJ | 1         | 394    | 2   | 49         | 3     | 2 | T4 | N0 | MX |
| TCGA-2L-AAQL | 1         | 292    | 1   | 82         | 2     | 3 | T3 | N1 | MX |
| TCGA-2L-AAQM | 0         | 1383   | 1   | 52         | 2     | 1 | T3 | N1 | MX |
| TCGA-3A-A9I7 | 0         | 1323   | 1   | 45         | 2     | 2 | T3 | N1 | MX |
| TCGA-3A-A9I9 | 1         | 634    | 1   | 67         | 2     | 2 | T3 | N0 | MX |
| TCGA-3A-A9IB | 1         | 224    | 2   | 69         | 2     | 3 | T3 | N1 | MX |
| TCGA-3A-A9IC | 1         | 738    | 2   | 61         | 2     | 2 | T3 | N1 | MX |
| TCGA-3A-A9IH | 0         | 1021   | 2   | 66         | 1     | 2 | T1 | N0 | MX |
| TCGA-3A-A9IJ | 0         | 1854   | 1   | 65         | 1     | 1 | T2 | N0 | MX |
| TCGA-3A-A9IL | 0         | 2741   | 2   | 39         | 1     | 1 | T1 | N1 | MX |
| TCGA-3A-A9IN | 0         | 2084   | 2   | 62         | 1     | 2 | T2 | NX | MX |
| TCGA-3A-A9IR | 0         | 1542   | 2   | 64         | 1     | 1 | T2 | N0 | MX |
| TCGA-3A-A9IS | 0         | 998    | 1   | 67         | 1     | 1 | T2 | N0 | MX |
| TCGA-3A-A9IU | 1         | 458    | 1   | 65         | 2     | 3 | T3 | N1 | MX |
| TCGA-3A-A9IV | 0         | 1103   | 2   | 59         | 1     | 1 | T2 | N0 | MX |
| TCGA-3A-A9IX | 0         | 1037   | 1   | 40         | 1     | 2 | T1 | N0 | MX |
| TCGA-3A-A9IZ | 1         | 308    | 1   | 47         | 2     | 2 | T3 | N1 | MX |
| TCGA-3A-A9J0 | 0         | 743    | 1   | 75         | 2     | 2 | T3 | N1 | MX |
| TCGA-3E-AAAY | 0         | 2285   | 1   | 67         | 2     | 3 | T3 | N1 | MX |
| TCGA-3E-AAAZ | 1         | 2182   | 1   | 71         | 2     | 2 | T3 | N0 | MX |
| TCGA-F2-6879 | 1         | 334    | 1   | 57         | 2     | 2 | T3 | N1 | M0 |
| TCGA-F2-6880 | 0         | 295    | 1   | 70         | 2     | 1 | T3 | N1 | M0 |
| TCGA-F2-7273 | 1         | 592    | 1   | 54         | 2     | 3 | T3 | N1 | M0 |
| TCGA-F2-7276 | 1         | 216    | 1   | 64         | 2     | 1 | T3 | N1 | M0 |
| TCGA-F2-A44G | 1         | 233    | 2   | 79         | 2     | 2 | T3 | N1 | M0 |
| TCGA-F2-A44H | 0         | 586    | 1   | 65         | 2     | 2 | T3 | N0 | M0 |
| TCGA-F2-A7TX | 1         | 95     | 1   | 77         | 2     | 3 | T3 | N1 | M0 |
| TCGA-F2-A8YN | 0         | 517    | 1   | 76         | 2     | 2 | T3 | N0 | M0 |
| TCGA-FB-A4P5 | 1         | 179    | 2   | 69         | 2     | 2 | T3 | N1 | MX |
| TCGA-FB-A4P6 | 0         | 767    | 1   | 54         | 2     | 1 | T3 | N1 | MX |
| TCGA-FB-A545 | 1         | 732    | 2   | 72         | 2     | 2 | T3 | N1 | M0 |
| TCGA-FB-A5VM | 1         | 498    | 1   | 74         | 1     | 3 | T2 | N0 | M0 |
| TCGA-FB-A78T | 1         | 375    | 2   | 71         | 2     | 2 | T3 | N1 | M0 |
| TCGA-FB-A7DR | 1         | 353    | 1   | 48         | 2     | 2 | T3 | NX | M0 |
| TCGA-FB-AAPP | 1         | 485    | 1   | 71         | 2     | 3 | T3 | N1 | MX |
| TCGA-FB-AAPQ | 1         | 1130   | 1   | 65         | 2     | 2 | T3 | N1 | MX |
| TCGA-FB-AAPS | 0         | 228    | 2   | 62         | 2     | 2 | T2 | N1 | MX |
| TCGA-FB-AAPU | 1         | 381    | 2   | 41         | 2     | 2 | T3 | N0 | MX |

|              |   |      |   |    |   |   |    |    |    |
|--------------|---|------|---|----|---|---|----|----|----|
| TCGA-FB-AAPY | 1 | 1059 | 1 | 71 | 2 | 2 | T2 | N1 | MX |
| TCGA-FB-AAPZ | 0 | 716  | 1 | 54 | 2 | 3 | T2 | N1 | MX |
| TCGA-FB-AAQ0 | 1 | 473  | 1 | 68 | 2 | 3 | T3 | N0 | MX |
| TCGA-FB-AAQ1 | 1 | 123  | 1 | 49 | 2 | 2 | T3 | N1 | MX |
| TCGA-FB-AAQ2 | 1 | 153  | 2 | 81 | 2 | 3 | T3 | N1 | MX |
| TCGA-FB-AAQ3 | 1 | 31   | 2 | 65 | 2 | 2 | T3 | N1 | MX |
| TCGA-FB-AAQ6 | 1 | 244  | 1 | 85 | 1 | 2 | T1 | N0 | MX |
| TCGA-H6-8124 | 0 | 392  | 2 | 56 | 2 | 3 | T3 | N1 | M0 |
| TCGA-H6-A45N | 1 | 397  | 2 | 88 | 2 | 3 | T3 | N1 | MX |
| TCGA-H8-A6C1 | 0 | 671  | 1 | 53 | 2 | 2 | T3 | N0 | MX |
| TCGA-HV-A5A3 | 1 | 128  | 1 | 50 | 2 | 2 | T3 | NX | MX |
| TCGA-HV-A5A4 | 0 | 232  | 2 | 72 | 2 | 2 | T3 | N0 | MX |
| TCGA-HV-A5A5 | 0 | 289  | 2 | 61 | 2 | 2 | T3 | N1 | M0 |
| TCGA-HV-A5A6 | 1 | 2036 | 2 | 65 | 2 | 1 | T3 | N1 | M0 |
| TCGA-HV-A7OL | 0 | 252  | 1 | 70 | 2 | 2 | T3 | N0 | MX |
| TCGA-HV-AA8V | 0 | 920  | 1 | 50 | 2 | 3 | T3 | N1 | MX |
| TCGA-HV-AA8X | 1 | 532  | 2 | 75 | 2 | 2 | T2 | N1 | MX |
| TCGA-HZ-7289 | 1 | 661  | 1 | 77 | 2 | 1 | T3 | N1 | MX |
| TCGA-HZ-7918 | 0 | 969  | 1 | 72 | 2 | 3 | T3 | N1 | M0 |
| TCGA-HZ-7919 | 1 | 593  | 2 | 52 | 2 | 2 | T3 | N1 | M0 |
| TCGA-HZ-7920 | 1 | 236  | 1 | 71 | 1 | 2 | T2 | N0 | MX |
| TCGA-HZ-7923 | 0 | 314  | 1 | 65 | 2 | 2 | T3 | N0 | MX |
| TCGA-HZ-7924 | 0 | 840  | 2 | 60 | 2 | 2 | T3 | N0 | MX |
| TCGA-HZ-7925 | 1 | 614  | 1 | 66 | 2 | 2 | T3 | N1 | MX |
| TCGA-HZ-7926 | 1 | 518  | 1 | 57 | 2 | 1 | T3 | N1 | MX |
| TCGA-HZ-8001 | 0 | 706  | 1 | 69 | 3 | 2 | T4 | N0 | MX |
| TCGA-HZ-8002 | 1 | 366  | 1 | 61 | 2 | 2 | T3 | N1 | MX |
| TCGA-HZ-8003 | 1 | 596  | 2 | 65 | 2 | 2 | T3 | N1 | MX |
| TCGA-HZ-8005 | 1 | 120  | 1 | 81 | 2 | 3 | T3 | N1 | MX |
| TCGA-HZ-8315 | 1 | 299  | 2 | 54 | 2 | 2 | T3 | N0 | MX |
| TCGA-HZ-8317 | 1 | 378  | 2 | 69 | 2 | 1 | T3 | N1 | MX |
| TCGA-HZ-8519 | 0 | 454  | 1 | 73 | 1 | 3 | T1 | N0 | MX |
| TCGA-HZ-8636 | 1 | 545  | 2 | 58 | 4 | 3 | T3 | N0 | M1 |
| TCGA-HZ-8637 | 1 | 517  | 2 | 76 | 2 | 3 | T3 | N1 | MX |
| TCGA-HZ-A49G | 0 | 660  | 2 | 58 | 2 | 2 | T2 | N1 | MX |
| TCGA-HZ-A49H | 0 | 491  | 2 | 68 | 2 | 2 | T3 | N1 | MX |
| TCGA-HZ-A49I | 1 | 308  | 1 | 77 | 2 | 2 | T3 | N1 | MX |
| TCGA-HZ-A4BH | 0 | 194  | 1 | 75 | 2 | 3 | T3 | N1 | MX |
| TCGA-HZ-A4BK | 0 | 657  | 1 | 72 | 2 | 3 | T3 | N1 | MX |
| TCGA-HZ-A77O | 1 | 160  | 2 | 77 | 2 | 2 | T2 | N1 | MX |
| TCGA-HZ-A77P | 0 | 330  | 1 | 77 | 2 | 1 | T3 | N1 | MX |
| TCGA-HZ-A77Q | 0 | 33   | 2 | 55 | 2 | 2 | T3 | N1 | MX |
| TCGA-HZ-A9TJ | 0 | 603  | 1 | 70 | 4 | 2 | T3 | N0 | M1 |
| TCGA-IB-7644 | 1 | 394  | 2 | 65 | 4 | 2 | T3 | N1 | M1 |
| TCGA-IB-7645 | 1 | 1502 | 2 | 44 | 2 | 1 | T3 | N1 | M0 |
| TCGA-IB-7646 | 1 | 145  | 1 | 60 | 2 | 2 | T3 | N1 | M0 |
| TCGA-IB-7649 | 1 | 467  | 2 | 73 | 2 | 2 | T3 | N1 | M0 |
| TCGA-IB-7651 | 1 | 603  | 2 | 64 | 2 | 2 | T3 | N1 | M0 |
| TCGA-IB-7652 | 0 | 1116 | 2 | 49 | 2 | 2 | T3 | N1 | M0 |
| TCGA-IB-7654 | 1 | 476  | 1 | 80 | 2 | 2 | T2 | N1 | M0 |
| TCGA-IB-7885 | 0 | 1257 | 2 | 78 | 2 | 2 | T3 | N1 | M0 |
| TCGA-IB-7886 | 1 | 123  | 1 | 80 | 2 | 3 | T3 | N1 | M0 |
| TCGA-IB-7887 | 1 | 110  | 2 | 62 | 2 | 2 | T3 | N1 | M0 |
| TCGA-IB-7888 | 1 | 1332 | 2 | 66 | 2 | 2 | T3 | N0 | M0 |
| TCGA-IB-7889 | 1 | 481  | 2 | 85 | 2 | 1 | T3 | N1 | M0 |
| TCGA-IB-7890 | 1 | 598  | 1 | 73 | 1 | 3 | T2 | N0 | M0 |
| TCGA-IB-7891 | 1 | 913  | 2 | 49 | 2 | 1 | T3 | N1 | M0 |
| TCGA-IB-7893 | 1 | 117  | 1 | 64 | 2 | 3 | T3 | N0 | M0 |
| TCGA-IB-7897 | 1 | 486  | 2 | 53 | 2 | 2 | T3 | N1 | M0 |
| TCGA-IB-8126 | 0 | 462  | 2 | 79 | 3 | 1 | T4 | N1 | M0 |
| TCGA-IB-8127 | 0 | 522  | 1 | 59 | 2 | 2 | T3 | N1 | M0 |

|              |   |      |   |    |   |   |    |    |    |
|--------------|---|------|---|----|---|---|----|----|----|
| TCGA-IB-A5SO | 1 | 365  | 1 | 71 | 2 | 2 | T3 | N1 | M0 |
| TCGA-IB-A5SP | 0 | 482  | 1 | 77 | 2 | 2 | T3 | N0 | M0 |
| TCGA-IB-A5SQ | 1 | 219  | 2 | 56 | 1 | 2 | T2 | N0 | M0 |
| TCGA-IB-A5SS | 1 | 460  | 2 | 64 | 2 | 3 | T3 | N1 | M0 |
| TCGA-IB-A5ST | 0 | 635  | 2 | 64 | 2 | 2 | T3 | N1 | M0 |
| TCGA-IB-A6UF | 0 | 666  | 1 | 63 | 2 | 2 | T3 | N1 | M0 |
| TCGA-IB-A6UG | 1 | 41   | 1 | 65 | 2 | 3 | T3 | N1 | M0 |
| TCGA-IB-A7LX | 1 | 250  | 1 | 57 | 2 | 2 | T3 | N1 | MX |
| TCGA-IB-A7M4 | 0 | 483  | 1 | 81 | 2 | 3 | T3 | N1 | MX |
| TCGA-IB-AAUN | 1 | 144  | 2 | 74 | 1 | 2 | T2 | N0 | M0 |
| TCGA-IB-AAUO | 1 | 239  | 2 | 64 | 2 | 3 | T3 | N1 | M0 |
| TCGA-IB-AAUP | 0 | 431  | 1 | 68 | 2 | 2 | T3 | N1 | M0 |
| TCGA-IB-AAUQ | 1 | 183  | 1 | 50 | 2 | 2 | T3 | N1 | M0 |
| TCGA-IB-AAUR | 0 | 338  | 1 | 67 | 2 | 1 | T3 | N1 | M0 |
| TCGA-IB-AAUS | 0 | 225  | 2 | 84 | 2 | 2 | T3 | N1 | M0 |
| TCGA-IB-AAUT | 0 | 287  | 1 | 65 | 2 | 1 | T2 | N1 | M0 |
| TCGA-IB-AAUU | 0 | 245  | 1 | 35 | 2 | 3 | T3 | N1 | M0 |
| TCGA-IB-AAUV | 0 | 404  | 1 | 49 | 2 | 2 | T3 | N1 | M0 |
| TCGA-IB-AAUW | 1 | 230  | 2 | 63 | 2 | 3 | T3 | N1 | M0 |
| TCGA-L1-A7W4 | 1 | 278  | 2 | 48 | 2 | 3 | T3 | N1 | M0 |
| TCGA-LB-A7SX | 1 | 393  | 2 | 74 | 2 | 2 | T3 | N1 | MX |
| TCGA-LB-A8F3 | 0 | 379  | 2 | 64 | 2 | 1 | T3 | N0 | MX |
| TCGA-LB-A9Q5 | 1 | 313  | 2 | 63 | 2 | 3 | T3 | N1 | MX |
| TCGA-M8-A5N4 | 0 | 584  | 2 | 48 | 2 | 2 | T3 | N0 | M0 |
| TCGA-OE-A75W | 1 | 267  | 1 | 75 | 2 | 1 | T3 | N0 | M0 |
| TCGA-PZ-A5RE | 1 | 470  | 2 | 44 | 2 | 3 | T3 | N1 | MX |
| TCGA-Q3-A5QY | 0 | 416  | 1 | 58 | 2 | 2 | T3 | N1 | MX |
| TCGA-Q3-AA2A | 0 | 95   | 2 | 64 | 1 | 1 | T3 | N1 | MX |
| TCGA-RB-A7B8 | 1 | 466  | 2 | 81 | 2 | 2 | T3 | N1 | MX |
| TCGA-RB-AA9M | 0 | 286  | 1 | 43 | 2 | 3 | T1 | N1 | MX |
| TCGA-S4-A8RM | 0 | 737  | 1 | 67 | 2 | 3 | T3 | N1 | MX |
| TCGA-S4-A8RO | 0 | 525  | 2 | 75 | 2 | 2 | T3 | N1 | MX |
| TCGA-S4-A8RP | 1 | 702  | 2 | 77 | 2 | 3 | T3 | N1 | MX |
| TCGA-US-A774 | 1 | 695  | 2 | 76 | 2 | 3 | T3 | N1 | MX |
| TCGA-US-A776 | 0 | 1216 | 1 | 61 | 2 | 2 | T3 | N0 | MX |
| TCGA-US-A779 | 1 | 511  | 2 | 54 | 2 | 1 | T3 | N1 | MX |
| TCGA-US-A77E | 1 | 430  | 1 | 73 | 2 | 3 | T3 | N1 | MX |
| TCGA-US-A77J | 1 | 568  | 2 | 81 | 2 | 2 | T3 | N1 | MX |
| TCGA-XD-AAUG | 0 | 420  | 2 | 66 | 4 | 2 | T3 | N1 | M1 |
| TCGA-XD-AAUH | 0 | 395  | 2 | 57 | 2 | 2 | T3 | N1 | M0 |
| TCGA-XD-AAUI | 1 | 366  | 2 | 50 | 2 | 2 | T3 | N1 | MX |
| TCGA-XD-AAUL | 0 | 498  | 1 | 56 | 2 | 2 | T3 | N0 | MX |
| TCGA-XN-A8T3 | 0 | 951  | 1 | 67 | 1 | 2 | T2 | N0 | M0 |
| TCGA-XN-A8T5 | 0 | 720  | 2 | 53 | 1 | 2 | T2 | N0 | M0 |
| TCGA-YB-A89D | 0 | 350  | 1 | 59 | 2 | 2 | T3 | N1 | MX |
| TCGA-YY-A8LH | 0 | 2016 | 2 | 61 | 2 | 3 | T3 | N1 | MX |
| TCGA-Z5-AAPL | 0 | 467  | 2 | 74 | 2 | 1 | T3 | N0 | M0 |

Table S2. Detailed clinical and pathologic information of CRA001160 dataset.

| Number    | Gender | Age(y/o) | Diabetes Mellitus | TNM Classification | Staging |
|-----------|--------|----------|-------------------|--------------------|---------|
| PUMCH-T1  | M      | 64       | N                 | T4N2M0             | III     |
| PUMCH-T2  | M      | 52       | N                 | T1cN1M0            | IIB     |
| PUMCH-T3  | F      | 58       | Y                 | T2N0M0             | IB      |
| PUMCH-T4  | F      | 72       | Y                 | T1cN1M0            | IIB     |
| PUMCH-T5  | F      | 65       | Y                 | T2N0M0             | IB      |
| PUMCH-T6  | M      | 64       | N                 | T3N0M0             | IIA     |
| PUMCH-T7  | M      | 70       | Y                 | T3N1M0             | IIB     |
| PUMCH-T8  | F      | 66       | N                 | T1cN2M0            | III     |
| PUMCH-T9  | M      | 36       | N                 | T2N0M0             | IIA     |
| PUMCH-T10 | M      | 61       | Y                 | T2N1M0             | IB      |
| PUMCH-T11 | M      | 51       | N                 | T3N1M0             | IIB     |
| PUMCH-T12 | M      | 54       | N                 | T3N2M0             | III     |
| PUMCH-T13 | F      | 58       | Y                 | T2N1M0             | IIB     |
| PUMCH-T14 | F      | 67       | Y                 | T2N1M0             | IIB     |
| PUMCH-T15 | F      | 54       | N                 | T2N1M0             | IIB     |
| PUMCH-T16 | F      | 56       | N                 | T2N1M0             | IIB     |
| PUMCH-T17 | F      | 71       | N                 | T2N0M0             | IB      |
| PUMCH-T18 | F      | 68       | Y                 | T2N0M0             | IB      |
| PUMCH-T19 | F      | 59       | N                 | T2N0M0             | IB      |
| PUMCH-T20 | M      | 59       | N                 | T3N1M0             | IIB     |
| PUMCH-T21 | M      | 59       | Y                 | T2N0M0             | IB      |
| PUMCH-T22 | F      | 67       | N                 | T2N0M0             | IB      |
| PUMCH-T23 | M      | 54       | Y                 | T2N1M0             | IIB     |
| PUMCH-T24 | F      | 44       | N                 | T1cN0M0            | IB      |

Table S3. The imaging channels for each antibody and antibody incubation information in tissue microenvironment landscape imaging.

| Primary antibody | Catalogue number | Provider    | Concentration | Incubation time | Channel  |
|------------------|------------------|-------------|---------------|-----------------|----------|
| anti-CD3         | 60181-1-Ig       | proteintech | 1:10000       | 1h              | opal 540 |
| anti-S100A14     | 10489-1-AP       | proteintech | 1:10000       | 1h              | opal 620 |
| anti-CD8         | 66868-1-Ig       | proteintech | 1:20000       | 1h              | opal 690 |

Table S4. Immune-related genes obtained from the ImmPort database.

|    | Symbol   |
|----|----------|
| 1  | AZGP1    |
| 2  | B2M      |
| 3  | CALR     |
| 4  | CANX     |
| 5  | CD1A     |
| 6  | CD1B     |
| 7  | CD1C     |
| 8  | CD1D     |
| 9  | CD1E     |
| 10 | CD4      |
| 11 | CD8A     |
| 12 | CD8B     |
| 13 | CD74     |
| 14 | CREB1    |
| 15 | CTSB     |
| 16 | CTSE     |
| 17 | CTSL     |
| 18 | CTSS     |
| 19 | FCER1G   |
| 20 | FCGRT    |
| 21 | PDIA3    |
| 22 | HFE      |
| 23 | HLA-A    |
| 24 | HLA-B    |
| 25 | HLA-C    |
| 26 | HLA-DMA  |
| 27 | HLA-DMB  |
| 28 | HLA-DOA  |
| 29 | HLA-DOB  |
| 30 | HLA-DPA1 |
| 31 | HLA-DPB1 |
| 32 | HLA-DQA1 |
| 33 | HLA-DQA2 |
| 34 | HLA-DQB1 |
| 35 | HLA-DRA  |
| 36 | HLA-DRB1 |
| 37 | HLA-DRB3 |
| 38 | HLA-DRB4 |
| 39 | HLA-DRB5 |
| 40 | HLA-E    |
| 41 | HLA-F    |
| 42 | HLA-G    |
| 43 | HLA-H    |
| 44 | MR1      |
| 45 | HSPA1A   |
| 46 | HSPA1B   |
| 47 | HSPA1L   |
| 48 | HSPA2    |
| 49 | HSPA4    |
| 50 | HSPA5    |
| 51 | HSPA6    |
| 52 | HSPA8    |
| 53 | HSP90AA1 |
| 54 | HSP90AB1 |
| 55 | ICAM1    |

56 IFNA1  
57 IFNA2  
58 IFNA4  
59 IFNA5  
60 IFNA6  
61 IFNA7  
62 IFNA8  
63 IFNA10  
64 IFNA13  
65 IFNA14  
66 IFNA16  
67 IFNA17  
68 IFNA21  
69 IFNG  
70 KIR2DL1  
71 KIR2DL2  
72 KIR2DL3  
73 KIR2DL4  
74 KIR2DS1  
75 KIR2DS3  
76 KIR2DS4  
77 KIR2DS5  
78 KIR3DL1  
79 KIR3DL2  
80 KLRC1  
81 KLRC2  
82 KLRC3  
83 KLRD1  
84 LTA  
85 CIITA  
86 MICA  
87 MICB  
88 NFYA  
89 NFYB  
90 NFYC  
91 LGMN  
92 PSMB8  
93 PSMC1  
94 PSMC2  
95 PSMC3  
96 PSMC4  
97 PSMC5  
98 PSMC6  
99 PSMD1  
100 PSMD2  
101 PSMD3  
102 PSMD4  
103 PSMD5  
104 PSMD7  
105 PSMD8  
106 PSMD10  
107 PSMD11  
108 PSMD13  
109 PSME1  
110 PSME2  
111 RELB  
112 RFX5

113 RFXAP  
114 SLC10A2  
115 TAP1  
116 TAP2  
117 TAPBP  
118 THBS1  
119 SEM1  
120 KLRC4  
121 AP3B1  
122 RFXANK  
123 PSMD6  
124 PSME3  
125 PSMD14  
126 CLEC4M  
127 IFI30  
128 PROCR  
129 ADRM1  
130 ECPAS  
131 TRPC4AP  
132 CD209  
133 UBXN1  
134 ERAP1  
135 TAPBPL  
136 KIR2DL5A  
137 ERAP2  
138 ULBP3  
139 ULBP2  
140 ULBP1  
141 KIR3DL3  
142 RAET1E  
143 RAET1L  
144 UBR1  
145 RAET1G  
146 PDIA2  
147 HAMP  
148 PI3  
149 CAMP  
150 DEFB4A  
151 PPBP  
152 REG3G  
153 CXCL14  
154 CXCL16  
155 SLPI  
156 CXCL8  
157 CXCL10  
158 CXCL9  
159 CXCL5  
160 CXCL11  
161 CXCL6  
162 CXCL1  
163 CXCL12  
164 CXCL13  
165 CXCL2  
166 PF4  
167 XCL1  
168 CXCL3  
169 DEFB103B



170 CCL13  
171 CCL1  
172 DEFB1  
173 CCL8  
174 ELANE  
175 DEFB103A  
176 DEFA3  
177 DEFA1  
178 TMSB10  
179 DEFA6  
180 DEFA5  
181 DEFA4  
182 LCN2  
183 LCN1  
184 COLEC10  
185 BPI  
186 S100A9  
187 S100A8  
188 DCD  
189 LCN6  
190 S100A12  
191 HTN3  
192 LCN8  
193 DEFA1B  
194 CCR10  
195 CELA1  
196 DEFB106A  
197 PENK  
198 BPIFC  
199 MMP12  
200 BPIFB6  
201 LEAP2  
202 SFTPD  
203 LCN9  
204 BPIFB2  
205 PTGDS  
206 TMSB4X  
207 PGLYRP1  
208 ZC3HAV1  
209 TMSB15A  
210 S100B  
211 S100A13  
212 S100A6  
213 DEFB119  
214 DEFB107A  
215 DEFB105A  
216 SERPIND1  
217 DEFB129  
218 DEFB127  
219 S100P  
220 S100A7  
221 DEFB104A  
222 DEFB126  
223 DEFB106B  
224 DEFB104B  
225 DEFB107B  
226 PGLYRP3

227 PGLYRP2  
228 S100A10  
229 S100A2  
230 DEFB125  
231 DEFB123  
232 DEFB105B  
233 DEFB132  
234 BPIFB3  
235 LCN12  
236 PGLYRP4  
237 S100A11  
238 S100A5  
239 S100A3  
240 S100A1  
241 DEFB128  
242 DEFB108B  
243 HTN1  
244 LMBR1L  
245 S100A7A  
246 DEFB118  
247 COLEC12  
248 TMSB4Y  
249 DEFB131A  
250 DEFB134  
251 DEFB130A  
252 DEFB124  
253 DEFB121  
254 DEFB116  
255 DEFB115  
256 DEFB114  
257 DEFB113  
258 DEFB112  
259 DEFB110  
260 TMSB15B  
261 DEFB133  
262 S100Z  
263 MAVS  
264 TMSB4XP8  
265 S100A14  
266 LCN10  
267 S100A16  
268 DEFB136  
269 DEFB135  
270 DEFB117  
271 ZC3HAV1L  
272 S100A7L2  
273 MBL3P  
274 DEFB4B  
275 BPIFB4  
276 IFNAR1  
277 AZU1  
278 DEFB131B  
279 DEFA1A3  
280 LCN1P1  
281 S100G  
282 DEFA7P  
283 DEFB130B

284 DEFB108F  
285 DEFB131C  
286 TCHHL1  
287 TINAGL1  
288 IFNGR1  
289 SLC22A17  
290 WFIKKN1  
291 WFDC2  
292 IL6  
293 UMODL1  
294 TGFB1  
295 PF4V1  
296 MMP9  
297 ANOS1  
298 TLR4  
299 SPAG11B  
300 A2M  
301 NFKB1  
302 APOBEC3G  
303 FABP6  
304 NOD2  
305 MBL2  
306 SFTPA1  
307 RBP1  
308 TLR2  
309 SLC40A1  
310 PLAU  
311 IL1B  
312 PAEP  
313 HJV  
314 MUC5AC  
315 OBP2A  
316 PLTP  
317 MX1  
318 DDX58  
319 IFNL1  
320 IRF3  
321 SFTPA2  
322 LPA  
323 LBP  
324 RBP4  
325 NOX4  
326 LTF  
327 IFNB1  
328 RBP5  
329 FABP7  
330 FABP5  
331 FABP3  
332 FABP2  
333 FABP4  
334 R3HDML  
335 BPIFA3  
336 BPIFB1  
337 OASL  
338 CRABP2  
339 CRABP1  
340 RBP7

341 DUOX1  
342 OBP2B  
343 RBP2  
344 LCN15  
345 CETP  
346 FABP12  
347 FABP9  
348 BPIFA1  
349 LCNL1  
350 C8G  
351 SPAG11A  
352 PI15  
353 NOX1  
354 PMP2  
355 APOD  
356 ORM2  
357 ORM1  
358 TNF  
359 CTSG  
360 PRTN3  
361 MAPK1  
362 PML  
363 AEN  
364 CYBB  
365 BPIFA2  
366 ISG20  
367 BCL3  
368 ISG20L2  
369 NOX5  
370 NOX3  
371 DUOX2  
372 TLR3  
373 TFRC  
374 IFIH1  
375 LRP1  
376 TRIM5  
377 IDO1  
378 GDF15  
379 NEDD4  
380 ADIPOQ  
381 STAT3  
382 STAT1  
383 IFNL2  
384 SOCS3  
385 SEMG1  
386 TNFSF10  
387 CCL20  
388 SOCS1  
389 RNASEL  
390 IRF1  
391 IL15  
392 APOBEC3F  
393 PLAAT4  
394 CHIT1  
395 CD40  
396 TLR7  
397 PPIA

398 ZYX  
399 NLRX1  
400 PGC  
401 VEGFA  
402 IKBKE  
403 ISG15  
404 DHX58  
405 TNFAIP3  
406 TFR2  
407 FCN2  
408 MUC4  
409 F2R  
410 ELN  
411 IL27  
412 MAPT  
413 LYZ  
414 CCL5  
415 LEP  
416 CYLD  
417 KLKB1  
418 CST4  
419 CSRP1  
420 MAPK14  
421 JUN  
422 ITGAV  
423 IRF5  
424 CCR6  
425 IL12B  
426 TLR8  
427 GNLY  
428 CD81  
429 EIF2AK2  
430 APOM  
431 CACYBP  
432 NOD1  
433 MAPK8  
434 MAPK3  
435 BST2  
436 BPHL  
437 PLA2G2A  
438 GRN  
439 NEWENTRY  
440 PDGFRA  
441 GNAI1  
442 WNT5A  
443 FURIN  
444 ADAR  
445 TYK2  
446 NOS2  
447 TRAF3  
448 TPT1  
449 TPM2  
450 NEO1  
451 AHNAK  
452 TLR1  
453 TK2  
454 PRDX2

455 MX2  
456 FGF2  
457 FGA  
458 TCF7L2  
459 F2RL1  
460 TKFC  
461 MSR1  
462 NFKBIZ  
463 LMBR1  
464 EPPIN  
465 SRC  
466 MPO  
467 ELAVL1  
468 ROBO3  
469 SP1  
470 SOD1  
471 PDF  
472 DLL4  
473 ECD  
474 SLC11A1  
475 DMBT1  
476 STING1  
477 SKIV2L  
478 SEMG2  
479 DES  
480 DCK  
481 DAXX  
482 TNFRSF10A  
483 TNFRSF10B  
484 EED  
485 CCL4  
486 LIMS1  
487 LALBA  
488 APOBEC3H  
489 TMPRSS6  
490 SPINK5  
491 MARCO  
492 BECN1  
493 TNFSF11  
494 KNG1  
495 CSK  
496 KLRK1  
497 KCNH2  
498 JUND  
499 JAK1  
500 CLDN4  
501 CCL28  
502 RNASE3  
503 RN7SL1  
504 IRF7  
505 IREB2  
506 ILK  
507 IL18  
508 IL17A  
509 LTB4R  
510 APOBEC3A  
511 MASP2

512 TRIM27  
513 RELA  
514 IL7R  
515 IL1A  
516 PTX3  
517 IFNAR2  
518 IFN1@  
519 SYTL1  
520 APOBEC3C  
521 DDX17  
522 PTGS2  
523 HTR1A  
524 SEPTIN7  
525 CD40LG  
526 CD14  
527 MASP1  
528 PROC  
529 MAP2K2  
530 MAP2K1  
531 HRG  
532 NDRG1  
533 IRF9  
534 TRIM22  
535 LANCL1  
536 PPP4C  
537 HMOX1  
538 HMGB1  
539 RNASE7  
540 ABCC4  
541 HGF  
542 HDAC1  
543 IFNLR1  
544 PLSCR1  
545 BACH2  
546 TANK  
547 PIK3CG  
548 ARRB1  
549 RSAD2  
550 STAB2  
551 TBK1  
552 PDYN  
553 PDGFRB  
554 PDCD1  
555 PCSK2  
556 PCSK1  
557 ARG2  
558 AQP9  
559 FASLG  
560 APOH  
561 BIRC5  
562 ANXA6  
563 IL22  
564 VTN  
565 VIM  
566 VCAM1  
567 PRDX1  
568 GFAP

569 GBP2  
570 ALB  
571 SLC29A3  
572 OAS1  
573 AGER  
574 UNC93B1  
575 TNFSF4  
576 NOS1  
577 ACTG1  
578 ACTA1  
579 ACO1  
580 SERPINA3  
581 CXCR1  
582 CCL15  
583 CCL14  
584 CCL16  
585 CCL19  
586 CCL18  
587 CCL17  
588 CCL26  
589 CCL22  
590 CCR3  
591 CCL4L1  
592 ACKR2  
593 CCR7  
594 CCL27  
595 CCR8  
596 ACKR4  
597 CCL2  
598 CCL21  
599 CCL7  
600 CCL3  
601 CCL11  
602 CCR5  
603 CCL23  
604 CCL25  
605 CCL3L3  
606 CCL4L2  
607 CCL3L1  
608 CCR1  
609 CCL24  
610 XCL2  
611 CXCR4  
612 CXCR6  
613 CCR4  
614 TAFA5  
615 TAFA3  
616 TAFA4  
617 TAFA1  
618 TAFA2  
619 CCL15-CCL14  
620 PTK2B  
621 IL4  
622 CDH1  
623 LTBP1  
624 IL13  
625 IL10



626 IL2  
627 PPARG  
628 FGR  
629 MIF  
630 CRP  
631 JAK2  
632 PTK2  
633 PTGDR  
634 CD86  
635 HCK  
636 VDR  
637 OLR1  
638 GRK2  
639 TXK  
640 RNASE2  
641 CD79A  
642 CD79B  
643 LYN  
644 SYK  
645 BTK  
646 BLNK  
647 VAV3  
648 VAV1  
649 VAV2  
650 RAC1  
651 RAC2  
652 RAC3  
653 PPP3CA  
654 PPP3CB  
655 PPP3CC  
656 CHP1  
657 PPP3R1  
658 PPP3R2  
659 CHP2  
660 NFAT5  
661 NFATC1  
662 NFATC2  
663 NFATC3  
664 NFATC4  
665 HRAS  
666 KRAS  
667 NRAS  
668 FOS  
669 CARD11  
670 BCL10  
671 MALT1  
672 CHUK  
673 IKBKB  
674 IKBKG  
675 NFKBIA  
676 NFKBIB  
677 NFKBIE  
678 CD19  
679 CR2  
680 PIK3R5  
681 PIK3R1  
682 PIK3R2

683 PIK3R3  
684 PIK3CA  
685 PIK3CB  
686 PIK3CD  
687 AKT3  
688 AKT1  
689 AKT2  
690 GSK3B  
691 INPP5D  
692 CD22  
693 CD72  
694 PTPN6  
695 LILRB3  
696 FCGR2B  
697 RASGRP3  
698 PLCG2  
699 PRKCB  
700 IFITM1  
701 IGH  
702 IGHA1  
703 IGHA2  
704 IGHD  
705 IGHD1-1  
706 IGHD1-14  
707 IGHD1-20  
708 IGHD1-26  
709 IGHD1-7  
710 IGHD2-15  
711 IGHD2-2  
712 IGHD2-21  
713 IGHD2-8  
714 IGHD3-10  
715 IGHD3-16  
716 IGHD3-22  
717 IGHD3-3  
718 IGHD3-9  
719 IGHD4-11  
720 IGHD4-17  
721 IGHD4-23  
722 IGHD4-4  
723 IGHD5-12  
724 IGHD5-18  
725 IGHD5-24  
726 IGHD5-5  
727 IGHD6-13  
728 IGHD6-19  
729 IGHD6-25  
730 IGHD6-6  
731 IGHD7-27  
732 IGHE  
733 IGHG1  
734 IGHG2  
735 IGHG3  
736 IGHG4  
737 IGHJ1  
738 IGHJ2  
739 IGHJ3

740 IGHJ4  
741 IGHJ5  
742 IGHJ6  
743 IGHM  
744 IGHV1-18  
745 IGHV1-2  
746 IGHV1-24  
747 IGHV1-3  
748 IGHV1-45  
749 IGHV1-46  
750 IGHV1-58  
751 IGHV1-69  
752 IGHV1-8  
753 IGHV1-38-4  
754 IGHV1-69-2  
755 IGHV2-26  
756 IGHV2-5  
757 IGHV2-70  
758 IGHV3-11  
759 IGHV3-13  
760 IGHV3-15  
761 IGHV3-16  
762 IGHV3-20  
763 IGHV3-21  
764 IGHV3-23  
765 IGHV3-30  
766 IGHV3-30-3  
767 IGHV3-30-5  
768 IGHV3-33  
769 IGHV3-35  
770 IGHV3-38  
771 IGHV3-43  
772 IGHV3-48  
773 IGHV3-49  
774 IGHV3-53  
775 IGHV3-64  
776 IGHV3-66  
777 IGHV3-7  
778 IGHV3-72  
779 IGHV3-73  
780 IGHV3-74  
781 IGHV3-9  
782 IGHV3-38-3  
783 IGHV3-69-1  
784 IGHV4-28  
785 IGHV4-30-1  
786 IGHV4-30-2  
787 IGHV4-30-4  
788 IGHV4-31  
789 IGHV4-34  
790 IGHV4-39  
791 IGHV4-4  
792 IGHV4-59  
793 IGHV4-61  
794 IGHV4-38-2  
795 IGHV5-51  
796 IGHV5-10-1

797 IGHV6-1  
798 IGHV7-4-1  
799 IGHV7-81  
800 IGK  
801 IGKC  
802 IGKDEL  
803 IGKJ  
804 IGKJ1  
805 IGKJ2  
806 IGKJ3  
807 IGKJ4  
808 IGKJ5  
809 IGKV@  
810 IGKV1-12  
811 IGKV1-13  
812 IGKV1-16  
813 IGKV1-17  
814 IGKV1-27  
815 IGKV1-33  
816 IGKV1-37  
817 IGKV1-39  
818 IGKV1-5  
819 IGKV1-6  
820 IGKV1-8  
821 IGKV1-9  
822 IGKV1D-12  
823 IGKV1D-13  
824 IGKV1D-16  
825 IGKV1D-17  
826 IGKV1D-33  
827 IGKV1D-37  
828 IGKV1D-39  
829 IGKV1D-42  
830 IGKV1D-43  
831 IGKV1D-8  
832 IGKV2-24  
833 IGKV2-28  
834 IGKV2-30  
835 IGKV2-40  
836 IGKV2D-24  
837 IGKV2D-28  
838 IGKV2D-29  
839 IGKV2D-30  
840 IGKV2D-40  
841 IGKV3-11  
842 IGKV3-15  
843 IGKV3-20  
844 IGKV3-7  
845 IGKV3D-11  
846 IGKV3D-15  
847 IGKV3D-20  
848 IGKV3D-7  
849 IGKV4-1  
850 IGKV5-2  
851 IGKV6-21  
852 IGKV6D-21  
853 IGKV6D-41

854 IGL  
855 IGLC1  
856 IGLC2  
857 IGLC3  
858 IGLC6  
859 IGLC7  
860 IGLJ  
861 IGLJ1  
862 IGLJ2  
863 IGLJ3  
864 IGLJ4  
865 IGLJ5  
866 IGLJ6  
867 IGLJ7  
868 IGLV@  
869 IGLV1-36  
870 IGLV1-40  
871 IGLV1-44  
872 IGLV1-47  
873 IGLV1-50  
874 IGLV1-51  
875 IGLV10-54  
876 IGLV11-55  
877 IGLV2-11  
878 IGLV2-14  
879 IGLV2-18  
880 IGLV2-23  
881 IGLV2-33  
882 IGLV2-8  
883 IGLV3-1  
884 IGLV3-10  
885 IGLV3-12  
886 IGLV3-16  
887 IGLV3-19  
888 IGLV3-21  
889 IGLV3-22  
890 IGLV3-25  
891 IGLV3-27  
892 IGLV3-32  
893 IGLV3-9  
894 IGLV4-3  
895 IGLV4-60  
896 IGLV4-69  
897 IGLV5-37  
898 IGLV5-39  
899 IGLV5-45  
900 IGLV5-48  
901 IGLV5-52  
902 IGLV6-57  
903 IGLV7-43  
904 IGLV7-46  
905 IGLV8-61  
906 IGLV9-49  
907 C3  
908 C5  
909 CCL3P1  
910 CKLF

911 CMA1  
912 CX3CL1  
913 CXCL17  
914 CCN1  
915 EDN1  
916 EDN2  
917 EDN3  
918 FGF10  
919 LECT2  
920 PPBPP1  
921 PROK2  
922 SAA1  
923 SAA2  
924 SBDS  
925 SEMA3A  
926 SEMA3B  
927 SEMA3C  
928 SEMA3D  
929 SEMA3E  
930 SEMA3F  
931 SEMA3G  
932 SEMA4A  
933 SEMA4B  
934 SEMA4C  
935 SEMA4D  
936 SEMA4F  
937 SEMA4G  
938 SEMA5A  
939 SEMA5B  
940 SEMA6A  
941 SEMA6B  
942 SEMA6C  
943 SEMA6D  
944 SEMA7A  
945 SLIT1  
946 SLIT2  
947 TNC  
948 TYMP  
949 C5AR1  
950 CCR9  
951 CCRL2  
952 CMKLR1  
953 CX3CR1  
954 CXCR3  
955 CXCR5  
956 ACKR3  
957 CYSLTR1  
958 CYSLTR2  
959 ACKR1  
960 EDNRA  
961 EDNRB  
962 FPR1  
963 FPR2  
964 GPR17  
965 GPR32  
966 GPR33  
967 PTGDR2

968 C5AR2  
969 CXCR2  
970 LTB4R2  
971 PLAUR  
972 PLXNA1  
973 PLXNA2  
974 PLXNA3  
975 PLXNA4  
976 PLXNB1  
977 PLXNB2  
978 PLXNB3  
979 PLXNC1  
980 PLXND1  
981 PTAFR  
982 ROBO1  
983 ROBO2  
984 RXFP3  
985 XCR1  
986 ADM  
987 ADM2  
988 AGRP  
989 AGT  
990 AMBN  
991 AMELX  
992 AMH  
993 ANGPTL5  
994 ANGPTL7  
995 APLN  
996 AREG  
997 MANF  
998 CDNF  
999 ARTN  
1000 AVP  
1001 BDNF  
1002 BMP1  
1003 BMP10  
1004 BMP15  
1005 BMP2  
1006 BMP3  
1007 BMP4  
1008 BMP5  
1009 BMP6  
1010 BMP7  
1011 BMP8A  
1012 BMP8B  
1013 BTC  
1014 MYDGF  
1015 CALCA  
1016 CALCB  
1017 CAT  
1018 CCK  
1019 CD320  
1020 CD70  
1021 ADA2  
1022 CER1  
1023 CGA  
1024 CGB3

1025 CGB1  
1026 CGB2  
1027 CGB5  
1028 CGB7  
1029 CGB8  
1030 CHGA  
1031 CHGB  
1032 CLCF1  
1033 CLEC11A  
1034 CMTM1  
1035 CMTM2  
1036 CMTM3  
1037 CMTM4  
1038 CMTM5  
1039 CMTM6  
1040 CMTM7  
1041 CMTM8  
1042 CNTF  
1043 CORT  
1044 CRH  
1045 CSF1  
1046 CSF2  
1047 CSF3  
1048 CSH1  
1049 CSH2  
1050 CSHL1  
1051 CSPG5  
1052 CTF1  
1053 CCN2  
1054 DKK1  
1055 EBI3  
1056 EGF  
1057 EPGN  
1058 EPO  
1059 EREG  
1060 ESM1  
1061 FAM3B  
1062 FAM3C  
1063 FAM3D  
1064 FGF1  
1065 FGF11  
1066 FGF12  
1067 FGF13  
1068 FGF14  
1069 FGF16  
1070 FGF17  
1071 FGF18  
1072 FGF19  
1073 FGF20  
1074 FGF21  
1075 FGF22  
1076 FGF23  
1077 FGF3  
1078 FGF4  
1079 FGF5  
1080 FGF6  
1081 FGF7



1082 FGF8  
1083 FGF9  
1084 VEGFD  
1085 FIGNL2  
1086 FLT3LG  
1087 FSHB  
1088 GAL  
1089 GALP  
1090 GAST  
1091 GCG  
1092 GDF1  
1093 GDF10  
1094 GDF11  
1095 GDF2  
1096 GDF3  
1097 GDF5  
1098 GDF6  
1099 GDF7  
1100 GDF9  
1101 GDNF  
1102 GH1  
1103 GH2  
1104 GHRH  
1105 GHRL  
1106 GIP  
1107 GKN1  
1108 GMFB  
1109 GMFG  
1110 GNRH1  
1111 GNRH2  
1112 GPHA2  
1113 GPHB5  
1114 GPI  
1115 GREM1  
1116 GREM2  
1117 GRP  
1118 GUCA2A  
1119 HBEGF  
1120 HDGF  
1121 HDGFL3  
1122 IAPP  
1123 IFNE  
1124 IFNK  
1125 IFNW1  
1126 IGF1  
1127 IGF2  
1128 IL11  
1129 IL12A  
1130 IL16  
1131 IL17B  
1132 IL17C  
1133 IL17D  
1134 IL17F  
1135 IL19  
1136 IL1F10  
1137 IL36RN  
1138 IL36A

1139 IL37  
1140 IL36B  
1141 IL36G  
1142 IL1RN  
1143 IL20  
1144 IL21  
1145 IL23A  
1146 IL24  
1147 IL25  
1148 IL26  
1149 IFNL3  
1150 IL3  
1151 IL31  
1152 IL32  
1153 IL33  
1154 IL34  
1155 IL5  
1156 IL6ST  
1157 IL7  
1158 IL9  
1159 INHA  
1160 INHBA  
1161 INHBB  
1162 INHBC  
1163 INHBE  
1164 INS  
1165 INS-IGF2  
1166 INSL3  
1167 INSL4  
1168 INSL5  
1169 INSL6  
1170 JAG1  
1171 JAG2  
1172 FGF7P6  
1173 FGF7P3  
1174 KITLG  
1175 KL  
1176 LACRT  
1177 LEFTY1  
1178 LEFTY2  
1179 LHB  
1180 LIF  
1181 LRSAM1  
1182 LTB  
1183 LTBP2  
1184 LTBP3  
1185 LTBP4  
1186 MDK  
1187 MIA  
1188 MLN  
1189 MSTN  
1190 NAMPT  
1191 NDP  
1192 NENF  
1193 NGF  
1194 NMB  
1195 NODAL

1196 CCN3  
1197 NPFF  
1198 NPPA  
1199 NPPB  
1200 NPPC  
1201 NPY  
1202 NRG1  
1203 NRG2  
1204 NRG3  
1205 NRG4  
1206 NRTN  
1207 NTF3  
1208 NTF4  
1209 NTS  
1210 NUDT6  
1211 OGN  
1212 OSGIN1  
1213 OSM  
1214 OSTN  
1215 OXT  
1216 ENDOU  
1217 PDGFA  
1218 PDGFB  
1219 PDGFC  
1220 PDGFD  
1221 PDGFRL  
1222 PGF  
1223 PMCH  
1224 PNOC  
1225 POMC  
1226 PPBPP2  
1227 PPY  
1228 PRL  
1229 PRLH  
1230 PROK1  
1231 PSPN  
1232 PTH  
1233 PTH2  
1234 PTHLH  
1235 PTN  
1236 PYY  
1237 QRFP  
1238 RABEP1  
1239 RABEP2  
1240 REG1A  
1241 RETN  
1242 RETNLB  
1243 RLN1  
1244 RLN2  
1245 RLN3  
1246 SCG2  
1247 SCGB3A1  
1248 SCT  
1249 AIMP1  
1250 SECTM1  
1251 SLURP1  
1252 SPP1

1253 SST  
1254 STC1  
1255 STC2  
1256 TAC1  
1257 TDGF1  
1258 TDGF1P3  
1259 TG  
1260 TGFA  
1261 TGFB2  
1262 TGFB3  
1263 THPO  
1264 TNFRSF11B  
1265 TNFSF12  
1266 TNFSF13  
1267 TNFSF13B  
1268 TNFSF14  
1269 TNFSF15  
1270 TNFSF18  
1271 TNFSF8  
1272 TNFSF9  
1273 TOR2A  
1274 TRH  
1275 TSHB  
1276 TSLP  
1277 TXLNA  
1278 UCN  
1279 UCN2  
1280 UCN3  
1281 UTS2  
1282 UTS2B  
1283 VEGFB  
1284 VEGFC  
1285 VGF  
1286 VIP  
1287 ACVR1B  
1288 ACVR1C  
1289 ACVR2A  
1290 ACVR2B  
1291 ACVRL1  
1292 ADCYAP1R1  
1293 ADIPOR1  
1294 ADIPOR2  
1295 ADRB1  
1296 ADRB2  
1297 AGTR1  
1298 AGTR2  
1299 AMHR2  
1300 ANGPT1  
1301 ANGPT4  
1302 ANGPTL1  
1303 ANGPTL2  
1304 ANGPTL3  
1305 ANGPTL4  
1306 ANGPTL6  
1307 APLNR  
1308 AR  
1309 AVPR1A

1310 AVPR1B  
1311 AVPR2  
1312 BMPR1A  
1313 BMPR1B  
1314 BMPR2  
1315 BRD8  
1316 C3AR1  
1317 CALCR  
1318 CALCRL  
1319 CNTFR  
1320 CRHR1  
1321 CRHR2  
1322 CRIM1  
1323 CRLF1  
1324 CRLF2  
1325 CRLF3  
1326 CSF1R  
1327 CSF2RA  
1328 CSF2RB  
1329 CSF3R  
1330 EGFR  
1331 ENG  
1332 EPOR  
1333 ESR1  
1334 ESR2  
1335 ESRRA  
1336 ESRRB  
1337 ESRRG  
1338 FGFR1  
1339 FGFR2  
1340 FGFR3  
1341 FGFR4  
1342 FGFR1  
1343 FLT1  
1344 FLT3  
1345 FLT4  
1346 FSHR  
1347 GALR2  
1348 GALR3  
1349 GCGR  
1350 GHR  
1351 GHRHR  
1352 GHSR  
1353 GIPR  
1354 GLP1R  
1355 GLP2R  
1356 GNRHR  
1357 GPER1  
1358 HNF4A  
1359 HNF4G  
1360 HTR3A  
1361 HTR3B  
1362 HTR3C  
1363 HTR3D  
1364 HTR3E  
1365 IFNGR2  
1366 IGF1R

1367 IGF2R  
1368 IL10RA  
1369 IL10RB  
1370 IL11RA  
1371 IL12RB1  
1372 IL12RB2  
1373 IL13RA1  
1374 IL13RA2  
1375 IL15RA  
1376 IL2RB  
1377 IL17RA  
1378 IL17RB  
1379 IL17RC  
1380 IL17RD  
1381 IL17RE  
1382 IL18R1  
1383 IL18RAP  
1384 IL1R1  
1385 IL1R2  
1386 IL1RAP  
1387 IL1RL1  
1388 IL1RL2  
1389 IL20RA  
1390 IL20RB  
1391 IL21R  
1392 IL22RA1  
1393 IL22RA2  
1394 IL23R  
1395 IL27RA  
1396 IL2RA  
1397 IL2RG  
1398 IL31RA  
1399 IL3RA  
1400 IL4R  
1401 IL5RA  
1402 IL6R  
1403 IL9R  
1404 INSR  
1405 KDR  
1406 LEPR  
1407 LGR4  
1408 LGR5  
1409 LGR6  
1410 LHCGR  
1411 LIFR  
1412 LTBR  
1413 MC1R  
1414 MC2R  
1415 MC3R  
1416 MC4R  
1417 MCHR1  
1418 MCHR2  
1419 MET  
1420 MLNR  
1421 MPL  
1422 MTNR1A  
1423 MTNR1B

1424 NGFR  
1425 NMBR  
1426 NPR1  
1427 NPR3  
1428 NR0B1  
1429 NR0B2  
1430 NR1D1  
1431 NR1D2  
1432 NR1H2  
1433 NR1H3  
1434 NR1H4  
1435 NR1I2  
1436 NR1I3  
1437 NR2C1  
1438 NR2C2  
1439 NR2E1  
1440 NR2E3  
1441 NR2F1  
1442 NR2F2  
1443 NR2F6  
1444 NR3C1  
1445 NR3C2  
1446 NR4A1  
1447 NR4A2  
1448 NR4A3  
1449 NR5A1  
1450 NR5A2  
1451 NR6A1  
1452 NRP1  
1453 NRP2  
1454 OGFR  
1455 OPRD1  
1456 OPRK1  
1457 OPRL1  
1458 OPRM1  
1459 OSMR  
1460 OXTR  
1461 PGR  
1462 PGRMC2  
1463 PPARA  
1464 PPARD  
1465 PRLHR  
1466 PRLR  
1467 PTGER1  
1468 PTGER2  
1469 PTGER3  
1470 PTGER4  
1471 PTGFR  
1472 PTH1R  
1473 PTH2R  
1474 RARA  
1475 RARB  
1476 RARG  
1477 RORA  
1478 RORB  
1479 RORC  
1480 RXFP1

1481 RXFP2  
1482 RXRA  
1483 RXRB  
1484 RXRG  
1485 S1PR1  
1486 S1PR2  
1487 SCTR  
1488 SDC1  
1489 SDC2  
1490 SDC3  
1491 SDC4  
1492 SORT1  
1493 SSTR1  
1494 SSTR2  
1495 SSTR5  
1496 ST2  
1497 TACR1  
1498 TEK  
1499 TGFB1  
1500 TGFB2  
1501 TGFB3  
1502 THRA  
1503 THRB  
1504 TIE1  
1505 TNFRSF10C  
1506 TNFRSF10D  
1507 TNFRSF11A  
1508 TNFRSF12A  
1509 TNFRSF13B  
1510 TNFRSF13C  
1511 TNFRSF14  
1512 TNFRSF17  
1513 TNFRSF18  
1514 TNFRSF19  
1515 TNFRSF1A  
1516 TNFRSF1B  
1517 TNFRSF21  
1518 TNFRSF25  
1519 TNFRSF4  
1520 TNFRSF6B  
1521 TNFRSF8  
1522 TNFRSF9  
1523 TRHR  
1524 TSHR  
1525 TUBB3  
1526 VIPR1  
1527 VIPR2  
1528 PTPN11  
1529 ICAM2  
1530 ITGAL  
1531 ITGB2  
1532 PAK1  
1533 NCR2  
1534 TYROBP  
1535 LCK  
1536 FCGR3A  
1537 FCGR3B



|      |         |
|------|---------|
| 1538 | NCR1    |
| 1539 | NCR3    |
| 1540 | CD247   |
| 1541 | ZAP70   |
| 1542 | LCP2    |
| 1543 | LAT     |
| 1544 | PLCG1   |
| 1545 | SH3BP2  |
| 1546 | FYN     |
| 1547 | SHC2    |
| 1548 | SHC4    |
| 1549 | SHC3    |
| 1550 | SHC1    |
| 1551 | GRB2    |
| 1552 | SOS1    |
| 1553 | SOS2    |
| 1554 | ARAF    |
| 1555 | BRAF    |
| 1556 | RAF1    |
| 1557 | HCST    |
| 1558 | CD48    |
| 1559 | CD244   |
| 1560 | PRKCA   |
| 1561 | PRKCG   |
| 1562 | SH2D1B  |
| 1563 | SH2D1A  |
| 1564 | FAS     |
| 1565 | GZMB    |
| 1566 | PRF1    |
| 1567 | CASP3   |
| 1568 | BID     |
| 1569 | CD3D    |
| 1570 | CD3E    |
| 1571 | CD3G    |
| 1572 | PTPRC   |
| 1573 | ITK     |
| 1574 | TEC     |
| 1575 | NCK1    |
| 1576 | NCK2    |
| 1577 | GRAP2   |
| 1578 | PAK2    |
| 1579 | PAK3    |
| 1580 | PAK4    |
| 1581 | PAK6    |
| 1582 | PAK5    |
| 1583 | RHOA    |
| 1584 | CDC42   |
| 1585 | CD28    |
| 1586 | ICOS    |
| 1587 | MAP3K8  |
| 1588 | MAP3K14 |
| 1589 | CTLA4   |
| 1590 | CBLC    |
| 1591 | CBL     |
| 1592 | CBLB    |
| 1593 | CDK4    |
| 1594 | RASGRP1 |

|      |        |
|------|--------|
| 1595 | PDK1   |
| 1596 | PRKCQ  |
| 1597 | TRAC   |
| 1598 | TRAJ1  |
| 1599 | TRAJ2  |
| 1600 | TRAJ3  |
| 1601 | TRAJ4  |
| 1602 | TRAJ5  |
| 1603 | TRAJ6  |
| 1604 | TRAJ7  |
| 1605 | TRAJ8  |
| 1606 | TRAJ9  |
| 1607 | TRAJ10 |
| 1608 | TRAJ11 |
| 1609 | TRAJ12 |
| 1610 | TRAJ13 |
| 1611 | TRAJ14 |
| 1612 | TRAJ15 |
| 1613 | TRAJ16 |
| 1614 | TRAJ17 |
| 1615 | TRAJ18 |
| 1616 | TRAJ19 |
| 1617 | TRAJ20 |
| 1618 | TRAJ21 |
| 1619 | TRAJ22 |
| 1620 | TRAJ23 |
| 1621 | TRAJ24 |
| 1622 | TRAJ25 |
| 1623 | TRAJ26 |
| 1624 | TRAJ27 |
| 1625 | TRAJ28 |
| 1626 | TRAJ29 |
| 1627 | TRAJ30 |
| 1628 | TRAJ31 |
| 1629 | TRAJ32 |
| 1630 | TRAJ33 |
| 1631 | TRAJ34 |
| 1632 | TRAJ35 |
| 1633 | TRAJ36 |
| 1634 | TRAJ37 |
| 1635 | TRAJ38 |
| 1636 | TRAJ39 |
| 1637 | TRAJ40 |
| 1638 | TRAJ41 |
| 1639 | TRAJ42 |
| 1640 | TRAJ43 |
| 1641 | TRAJ44 |
| 1642 | TRAJ45 |
| 1643 | TRAJ46 |
| 1644 | TRAJ47 |
| 1645 | TRAJ48 |
| 1646 | TRAJ49 |
| 1647 | TRAJ50 |
| 1648 | TRAJ52 |
| 1649 | TRAJ53 |
| 1650 | TRAJ54 |
| 1651 | TRAJ56 |

|      |             |
|------|-------------|
| 1652 | TRAJ57      |
| 1653 | TRAJ58      |
| 1654 | TRAJ59      |
| 1655 | TRAJ61      |
| 1656 | TRAV1-1     |
| 1657 | TRAV1-2     |
| 1658 | TRAV2       |
| 1659 | TRAV3       |
| 1660 | TRAV4       |
| 1661 | TRAV5       |
| 1662 | TRAV7       |
| 1663 | TRAV8-1     |
| 1664 | TRAV8-2     |
| 1665 | TRAV8-3     |
| 1666 | TRAV8-4     |
| 1667 | TRAV8-6     |
| 1668 | TRAV8-7     |
| 1669 | TRAV9-1     |
| 1670 | TRAV9-2     |
| 1671 | TRAV10      |
| 1672 | TRAV12-1    |
| 1673 | TRAV12-2    |
| 1674 | TRAV12-3    |
| 1675 | TRAV13-1    |
| 1676 | TRAV13-2    |
| 1677 | TRAV14DV4   |
| 1678 | TRAV16      |
| 1679 | TRAV17      |
| 1680 | TRAV18      |
| 1681 | TRAV19      |
| 1682 | TRAV20      |
| 1683 | TRAV21      |
| 1684 | TRAV22      |
| 1685 | TRAV23DV6   |
| 1686 | TRAV24      |
| 1687 | TRAV25      |
| 1688 | TRAV26-1    |
| 1689 | TRAV26-2    |
| 1690 | TRAV27      |
| 1691 | TRAV29DV5   |
| 1692 | TRAV30      |
| 1693 | TRAV34      |
| 1694 | TRAV35      |
| 1695 | TRAV36DV7   |
| 1696 | TRAV38-1    |
| 1697 | TRAV38-2DV8 |
| 1698 | TRAV39      |
| 1699 | TRAV40      |
| 1700 | TRAV41      |
| 1701 | TRBC1       |
| 1702 | TRBC2       |
| 1703 | TRBD1       |
| 1704 | TRBD2       |
| 1705 | TRBJ1-1     |
| 1706 | TRBJ1-2     |
| 1707 | TRBJ1-3     |
| 1708 | TRBJ1-4     |

|      |          |
|------|----------|
| 1709 | TRBJ1-5  |
| 1710 | TRBJ1-6  |
| 1711 | TRBJ2-1  |
| 1712 | TRBJ2-2  |
| 1713 | TRBJ2-3  |
| 1714 | TRBJ2-4  |
| 1715 | TRBJ2-5  |
| 1716 | TRBJ2-6  |
| 1717 | TRBJ2-7  |
| 1718 | TRBV2    |
| 1719 | TRBV3-1  |
| 1720 | TRBV4-1  |
| 1721 | TRBV4-2  |
| 1722 | TRBV4-3  |
| 1723 | TRBV5-1  |
| 1724 | TRBV5-4  |
| 1725 | TRBV5-5  |
| 1726 | TRBV5-6  |
| 1727 | TRBV5-7  |
| 1728 | TRBV5-8  |
| 1729 | TRBV6-1  |
| 1730 | TRBV6-2  |
| 1731 | TRBV6-3  |
| 1732 | TRBV6-4  |
| 1733 | TRBV6-5  |
| 1734 | TRBV6-6  |
| 1735 | TRBV6-7  |
| 1736 | TRBV6-8  |
| 1737 | TRBV6-9  |
| 1738 | TRBV7-2  |
| 1739 | TRBV7-3  |
| 1740 | TRBV7-4  |
| 1741 | TRBV7-6  |
| 1742 | TRBV7-7  |
| 1743 | TRBV7-8  |
| 1744 | TRBV7-9  |
| 1745 | TRBV9    |
| 1746 | TRBV10-1 |
| 1747 | TRBV10-2 |
| 1748 | TRBV10-3 |
| 1749 | TRBV11-1 |
| 1750 | TRBV11-2 |
| 1751 | TRBV11-3 |
| 1752 | TRBV12-3 |
| 1753 | TRBV12-4 |
| 1754 | TRBV12-5 |
| 1755 | TRBV13   |
| 1756 | TRBV14   |
| 1757 | TRBV15   |
| 1758 | TRBV16   |
| 1759 | TRBV17   |
| 1760 | TRBV18   |
| 1761 | TRBV19   |
| 1762 | TRBV20-1 |
| 1763 | TRBV24-1 |
| 1764 | TRBV25-1 |
| 1765 | TRBV27   |

|      |          |
|------|----------|
| 1766 | TRBV28   |
| 1767 | TRBV29-1 |
| 1768 | TRBV30   |
| 1769 | TRDC     |
| 1770 | TRDD1    |
| 1771 | TRDD2    |
| 1772 | TRDD3    |
| 1773 | TRDJ1    |
| 1774 | TRDJ2    |
| 1775 | TRDJ3    |
| 1776 | TRDJ4    |
| 1777 | TRDV1    |
| 1778 | TRDV2    |
| 1779 | TRDV3    |
| 1780 | TRGV9    |
| 1781 | TRGV8    |
| 1782 | TRGV5    |
| 1783 | TRGV4    |
| 1784 | TRGV3    |
| 1785 | TRGV2    |
| 1786 | TRGJP2   |
| 1787 | TRGJP1   |
| 1788 | TRGJP    |
| 1789 | TRGJ2    |
| 1790 | TRGJ1    |
| 1791 | TRGC2    |
| 1792 | TRGC1    |
| 1793 | TRAV6    |
